# Supplementary material for: Antiapoptotic Gene Genotype and Allele Variations and the Risk of Lymphoma
Source: MDPI journal article supplement (doi:10.3390/cancers15041012), 2023-02-05
Supplement: s1 [file s1]

**Table S3.** Whole exome sequencing of *BCL2* gene in lymphoma cases

| #   | Variant        | c-DNA_CHG     | AA_CHG              |
|-----|----------------|---------------|---------------------|
| 1.  | FRAMESHIFT-DEL | c.245del      | p. Ala82GlyfsTer14  |
| 2.  | MISSENSE       | c.239C>G      | p. Ala80Gly         |
| 3.  | FRAMESHIFT-DEL | c.234del      | p. Gly79AlafsTer17  |
| 4.  | FRAMESHIFT-INS | c.233_234insG | p. Gly79ArgfsTer74  |
| 5.  | FRAMESHIFT-DEL | c.511del      | p. Asp171ThrfsTer7  |
| 6.  | MISSENSE       | c.149C>T      | p. Ser50Phe         |
| 7.  | FRAMESHIFT-DEL | c.124del      | p. Ala42ProfsTer54  |
| 8.  | FRAMESHIFT-DEL | c.110_113del  | p. Ala37GlyfsTer58  |
| 9.  | MISSENSE       | c.520G>T      | p. Ala174Ser        |
| 10. | MISSENSE       | c.167C>T      | p. Thr56Met         |
| 11. | FRAMESHIFT-DEL | c.698del      | p. Gly233ValfsTer25 |
| 12. | FRAMESHIFT-DEL | c.119del      | p. Pro40ArgfsTer56  |
| 13. | MISSENSE       | c.347C>T      | p. Ser116Phe        |
| 14. | SILENT         | c.231C>T      | p. Ala77(=)         |
| 15. | MISSENSE       | c.125C>T      | p. Ala42Val         |
| 16. | FRAMESHIFT-DEL | c.508del      | p. Val170TrpfsTer8  |
| 17. | FRAMESHIFT-DEL | c.126del      | p. Ala43ProfsTer53  |
| 18. | MISSENSE       | c.91G>A       | p. Asp31Asn         |
| 19. | FRAMESHIFT-DEL | c.612del      | p. Ser205AlafsTer13 |
| 20. | MISSENSE       | c.298G>A      | p. Ala100Thr        |
| 21. | MISSENSE       | c.250C>T      | p. Pro84Ser         |
| 22. | MISSENSE       | c.537G>C      | p. Glu179Asp        |
| 23. | MISSENSE       | c.338C>G      | p. Ala113Gly        |
| 24. | MISSENSE       | c.308A>G      | p. Asp103Gly        |
| 25. | MISSENSE       | c.256C>G      | p. Leu86Val         |
| 26. | MISSENSE       | c.215T>C      | p. Leu72Pro         |
| 27. | MISSENSE       | c.214C>A      | p. Leu72Met         |
| 28. | MISSENSE       | c.184T>C      | p. Ser62Pro         |
| 29. | MISSENSE       | c.175C>T      | p. Pro59Ser         |
| 30. | MISSENSE       | c.40A>C       | p. Ile14Leu         |
| 31. | MISSENSE       | c.39G>C       | p. Glu13Asp         |
| 32. | MISSENSE       | c.23G>A       | p. Gly8Glu          |
| 33. | MISSENSE       | c.20C>G       | p. Thr7Arg          |
| 34. | MISSENSE       | c.581G>A      | p. Gly194Asp        |
| 35. | FRAMESHIFT-DEL | c.466del      | p. Val156SerfsTer22 |
| 36. | FRAMESHIFT-DEL | c.352del      | p. Gln118SerfsTer4  |
| 37. | MISSENSE       | c.185C>T      | p. Ser62Phe         |
| 38. | MISSENSE       | c.179C>T      | p. Ala60Val         |
| 39. | FRAMESHIFT-DEL | c.172del      | p. His58IlefsTer38  |
| 40. | MISSENSE       | c.156G>T      | p. Gln52His         |

---

|     |    |                |                  |                     |
|-----|----|----------------|------------------|---------------------|
| 41. | 1. | FRAMESHIFT-INS | c.119dup         | p. Ala42GlyfsTer111 |
| 42. | 2. | MISSENSE       | c.70T>G          | p. Ser24Ala         |
| 43. | 3. | MISSENSE       | c.17G>C          | p. Arg6Thr          |
| 44. | 4. | MISSENSE       | c.461G>A         | p. Gly154Asp        |
| 45. | 5. | FRAMESHIFT-INS | c.125_126insGCGG | p. Ala43ArgfsTer111 |
| 46. | 6. | MISSENSE       | c.434G>A         | p. Gly145Glu        |
| 47. | 7. | MISSENSE       | c.325C>T         | p. Arg109Cys        |
| 48. | 8. | MISSENSE       | c.206C>T         | p. Thr69Ile         |
| 49. | 9. | MISSENSE       | c.157C>T         | p. Pro53Ser         |

---
