# Supplementary material for: Antiapoptotic Gene Genotype and Allele Variations and the Risk of Lymphoma
Source: MDPI journal article supplement (doi:10.3390/cancers15041012), 2023-02-05
Supplement: s1 [file s1]

**Table S2.** ARMS primers for the *BCL2* *MCL1*, and *Survivin* genes mutation

| Primer sequence                                 |            |                                     | Product size | Annealing tempt |
|-------------------------------------------------|------------|-------------------------------------|--------------|-----------------|
| <b><i>BCL2</i> -938 (rs2279115 C&gt;A)</b>      |            |                                     |              |                 |
| <i>Bcl2</i> -FO                                 |            | 5'-CCGGCTCCTTCATCGTCTCC-3'          | 300bp        | 58 °C           |
| <i>Bcl2</i> -RO                                 |            | 5'-CCCAGGAGAGAGACAGGGGAAAT-3'       |              |                 |
| <i>Bcl2</i> -FI                                 | (A allele) | 5'-AATAAAACCCCTCCCCACACCT-3'        | 220bp        |                 |
| <i>Bcl2</i> -RI                                 | (C allele) | 5'-CCCTTCTCGGCAATTTACACGC-3'        | 121bp        |                 |
| <b><i>MCL1</i> (rs9803935 G&gt;T)</b>           |            |                                     |              |                 |
| <i>MCL1</i> Fo                                  |            | 5'-TGACTAACACAGGGGTTGAAGGAAGAGG-3'  | 276 bp       | 65°C            |
| <i>MCL1</i> Ro                                  |            | 5'-GCACCAAAGACTATGGAACAGAGATGGG-3'  |              |                 |
| <i>MCL1</i> FI                                  | (G allele) | 5'-GGCATAGTTGGGGACTTGTGGTTATTCTG-3' | 190 bp       |                 |
| <i>MCL1</i> RI                                  | (T allele) | 5'-AACATTGGACTGAGAGTAGAGAGCTGCGA-3' | 144 bp       |                 |
| <b><i>Survivin</i> -141 (rs17882312 C&gt;G)</b> |            |                                     |              |                 |
| Sur F1                                          | (C allele) | 5-ACTACAACTCCCGGCACACCCC-3          | 360 bp       | 60°C            |
| Sur F2                                          | (G allele) | 5-ACTACAACTCCCGGCACACCCG-3          |              |                 |
| Sur R                                           |            | 5-TTGTACCCCCGAGGCCAGTCA-3           |              |                 |
| <b><i>Survivin</i> -31 (rs9904341 G&gt;C)</b>   |            |                                     |              |                 |
| Sur F1                                          | (G allele) | 5-ATTAACCGCCAGATTTGAATCGCG-3        | 357bp        | 60°C            |
| Sur F2                                          | (C allele) | 5-ATTAACCGCCAGATTTGAATCGCC-3        |              |                 |
| Sur R                                           |            | 5-ACAAAGGCCTCGATGGGGACAAA-3         |              |                 |

Fo-outer forward primer: FI-inner forward primer

Ro-outer reverse primer: RI-outer reverse primer

**Table S2.** Whole exome sequencing of *BCL2* gene in lymphoma cases

| #   | Variant        | c-DNA_CHG     | AA_CHG              |
|-----|----------------|---------------|---------------------|
| 1.  | FRAMESHIFT-DEL | c.245del      | p. Ala82GlyfsTer14  |
| 2.  | MISSENSE       | c.239C>G      | p. Ala80Gly         |
| 3.  | FRAMESHIFT-DEL | c.234del      | p. Gly79AlafsTer17  |
| 4.  | FRAMESHIFT-INS | c.233_234insG | p. Gly79ArgfsTer74  |
| 5.  | FRAMESHIFT-DEL | c.511del      | p. Asp171ThrfsTer7  |
| 6.  | MISSENSE       | c.149C>T      | p. Ser50Phe         |
| 7.  | FRAMESHIFT-DEL | c.124del      | p. Ala42ProfsTer54  |
| 8.  | FRAMESHIFT-DEL | c.110_113del  | p. Ala37GlyfsTer58  |
| 9.  | MISSENSE       | c.520G>T      | p. Ala174Ser        |
| 10. | MISSENSE       | c.167C>T      | p. Thr56Met         |
| 11. | FRAMESHIFT-DEL | c.698del      | p. Gly233ValfsTer25 |
| 12. | FRAMESHIFT-DEL | c.119del      | p. Pro40ArgfsTer56  |
| 13. | MISSENSE       | c.347C>T      | p. Ser116Phe        |
| 14. | SILENT         | c.231C>T      | p. Ala77(=)         |
| 15. | MISSENSE       | c.125C>T      | p. Ala42Val         |
| 16. | FRAMESHIFT-DEL | c.508del      | p. Val170TrpfsTer8  |
| 17. | FRAMESHIFT-DEL | c.126del      | p. Ala43ProfsTer53  |
| 18. | MISSENSE       | c.91G>A       | p. Asp31Asn         |
| 19. | FRAMESHIFT-DEL | c.612del      | p. Ser205AlafsTer13 |
| 20. | MISSENSE       | c.298G>A      | p. Ala100Thr        |
| 21. | MISSENSE       | c.250C>T      | p. Pro84Ser         |
| 22. | MISSENSE       | c.537G>C      | p. Glu179Asp        |
| 23. | MISSENSE       | c.338C>G      | p. Ala113Gly        |
| 24. | MISSENSE       | c.308A>G      | p. Asp103Gly        |
| 25. | MISSENSE       | c.256C>G      | p. Leu86Val         |
| 26. | MISSENSE       | c.215T>C      | p. Leu72Pro         |
| 27. | MISSENSE       | c.214C>A      | p. Leu72Met         |
| 28. | MISSENSE       | c.184T>C      | p. Ser62Pro         |
| 29. | MISSENSE       | c.175C>T      | p. Pro59Ser         |
| 30. | MISSENSE       | c.40A>C       | p. Ile14Leu         |
| 31. | MISSENSE       | c.39G>C       | p. Glu13Asp         |
| 32. | MISSENSE       | c.23G>A       | p. Gly8Glu          |
| 33. | MISSENSE       | c.20C>G       | p. Thr7Arg          |
| 34. | MISSENSE       | c.581G>A      | p. Gly194Asp        |
| 35. | FRAMESHIFT-DEL | c.466del      | p. Val156SerfsTer22 |
| 36. | FRAMESHIFT-DEL | c.352del      | p. Gln118SerfsTer4  |
| 37. | MISSENSE       | c.185C>T      | p. Ser62Phe         |
| 38. | MISSENSE       | c.179C>T      | p. Ala60Val         |
| 39. | FRAMESHIFT-DEL | c.172del      | p. His58IlefsTer38  |
| 40. | MISSENSE       | c.156G>T      | p. Gln52His         |

|     |    |                |                  |                     |
|-----|----|----------------|------------------|---------------------|
| 41. | 1. | FRAMESHIFT-INS | c.119dup         | p. Ala42GlyfsTer111 |
| 42. | 2. | MISSENSE       | c.70T>G          | p. Ser24Ala         |
| 43. | 3. | MISSENSE       | c.17G>C          | p. Arg6Thr          |
| 44. | 4. | MISSENSE       | c.461G>A         | p. Gly154Asp        |
| 45. | 5. | FRAMESHIFT-INS | c.125_126insGCGG | p. Ala43ArgfsTer111 |
| 46. | 6. | MISSENSE       | c.434G>A         | p. Gly145Glu        |
| 47. | 7. | MISSENSE       | c.325C>T         | p. Arg109Cys        |
| 48. | 8. | MISSENSE       | c.206C>T         | p. Thr69Ile         |
| 49. | 9. | MISSENSE       | c.157C>T         | p. Pro53Ser         |

---
